# Supplementary material
Source: Springer Nature journal article supplement (https://www.springermedizin.de/resource/supplementary/12936_2012_2568_MOESM1_ESM.pdf/9543254)
Supplement: MOESM1 [file 9543254]

**Additional Table 1. List of SNPs investigated in the present study**

| Gene         | Location    | SNP      | dbSNP ID   | Assay ID       | Allele | Frequency |         |
|--------------|-------------|----------|------------|----------------|--------|-----------|---------|
|              |             |          |            |                |        | Control   | Malaria |
| <i>IL1B</i>  | intron      | -5839C>T | rs1143629  | C__1839945_1_  | T      | 0.538     | 0.456   |
|              |             |          |            |                | C      | 0.456     | 0.544   |
|              | 5' upstream | -31C>T   | rs1143627  | C__1839944_10  | C      | 0.504     | 0.496   |
|              |             |          |            |                | T      | 0.556     | 0.444   |
|              | 5' upstream | -511A>G  | rs16944    | C__1839943_10  | G      | 0.521     | 0.451   |
|              |             |          |            | A              | 0.479  | 0.549     |         |
| <i>IL2</i>   | 5' upstream | -330G>T  | rs2069762  | C__15859930_10 | T      | 0.712     | 0.641   |
|              |             |          |            |                | G      | 0.288     | 0.359   |
| <i>IL4</i>   | 5' upstream | -590C>T  | rs2243250  | C__16176216_10 | C      | 0.587     | 0.530   |
|              |             |          |            |                | T      | 0.413     | 0.470   |
| <i>IL4R</i>  | missense    | 1902A>G  | rs1801275  | C__2351160_20  | G      | 0.675     | 0.613   |
|              |             |          |            |                | A      | 0.325     | 0.387   |
| <i>IL6</i>   | 5' upstream | -174C>G  | rs1800795* |                | G      | 0.791     | 0.822   |
|              |             |          |            |                | C      | 0.209     | 0.178   |
| <i>IL8</i>   | 5' upstream | -251A>T  | rs4073     | C__11748116_10 | A      | 0.456     | 0.458   |
|              |             |          |            |                | T      | 0.544     | 0.542   |
| <i>IL10</i>  | 5' upstream | -592A>C  | rs1800872  | C__1747363_10  | A      | 0.342     | 0.377   |
|              |             |          |            |                | C      | 0.658     | 0.623   |
|              | 5' upstream | -1082T>C | rs1800896  | C__1747360_10  | G      | 0.707     | 0.771   |
|              |             |          |            |                | A      | 0.293     | 0.229   |
|              | 5' upstream | -819C>T  | rs1800871  | C__1747362_10  | T      | 0.345     | 0.379   |
|              |             |          |            | C              | 0.655  | 0.621     |         |
| <i>IL12A</i> | 3' UTR      | 121G>A   | rs568408   | C__2423981_10  | A      | 0.108     | 0.089   |
|              |             |          |            |                | G      | 0.892     | 0.911   |
| <i>IL12B</i> | 5' upstream | 735T>C   | rs7709212  | C__31985592_10 | T      | 0.440     | 0.469   |
|              |             |          |            |                | C      | 0.560     | 0.531   |
|              | intron      | 458A>G   | rs2546890  | C__15894458_10 | A      | 0.401     | 0.336   |

|                 |             |          |            |                |   |       |       |
|-----------------|-------------|----------|------------|----------------|---|-------|-------|
|                 |             |          |            |                | G | 0.599 | 0.664 |
|                 | 3' UTR      | 159A>C   | rs3212227  | C__2084293_10  | C | 0.385 | 0.430 |
| <i>IL12RB1</i>  | missense    | -1094A>G | rs375947   | C___795442_1_  | A | 0.615 | 0.570 |
|                 |             |          |            |                | A | 0.766 | 0.791 |
|                 |             |          |            |                | G | 0.234 | 0.209 |
|                 |             |          |            |                | C | 0.208 | 0.199 |
| <i>SP110</i>    | intron      | 14622C>T | rs2114592  | C__15816049_10 | T | 0.792 | 0.801 |
|                 |             |          |            |                | C | 0.918 | 0.907 |
|                 |             |          |            |                | T | 0.082 | 0.093 |
|                 |             |          |            |                | C | 0.880 | 0.863 |
| <i>TNF</i>      | 5' upstream | -308C>T  | rs1800629  | C___7514879_10 | T | 0.120 | 0.137 |
|                 |             |          |            |                | A | 0.076 | 0.073 |
|                 |             |          |            |                | G | 0.924 | 0.927 |
|                 |             |          |            |                | C | 0.240 | 0.219 |
|                 |             |          |            |                | T | 0.760 | 0.781 |
|                 |             |          |            |                | A | 0.074 | 0.061 |
|                 |             |          |            |                | G | 0.926 | 0.939 |
|                 |             |          |            |                | A | 0.210 | 0.202 |
|                 |             |          |            |                | C | 0.790 | 0.798 |
|                 |             |          |            |                | T | 0.144 | 0.150 |
| <i>TNFRSF1A</i> | intron      | 303A>G   | rs4149622  | C__32131594_10 | C | 0.856 | 0.850 |
|                 |             |          |            |                | A | 0.857 | 0.832 |
|                 |             |          |            |                | G | 0.143 | 0.168 |
| <i>IFNG</i>     | intron      | 874A>T   | rs2430561* |                | T | 0.742 | 0.717 |
|                 |             |          |            |                | A | 0.258 | 0.283 |
| <i>IFNGR1</i>   | 5' upstream | 611C>T   | rs1327474  | C___2523634_10 | G | 0.292 | 0.261 |
|                 |             |          |            |                | A | 0.708 | 0.739 |
|                 |             |          |            |                | T | 0.602 | 0.619 |
|                 |             |          |            |                | C | 0.398 | 0.381 |
| <i>VDR</i>      | missense    | FokI     | rs10735810 | C__12060045_20 | C | 0.651 | 0.645 |

|               |            |         |           |                |   |       |       |
|---------------|------------|---------|-----------|----------------|---|-------|-------|
|               |            |         |           |                | T | 0.349 | 0.355 |
|               | synonymous | TaqI    | rs731236  | C__2404008_10  | T | 0.729 | 0.701 |
|               |            |         |           |                | C | 0.271 | 0.299 |
|               | intron     | BsmI    | rs1544410 | C__8716062_10  | G | 0.719 | 0.726 |
|               |            |         |           |                | A | 0.281 | 0.274 |
| <i>PTPN22</i> | missense   | R630W   | rs2476601 | C__16021387_20 | G | 0.949 | 0.951 |
|               |            |         |           |                | A | 0.051 | 0.049 |
| <i>P2X7</i>   | missense   | 1513T>G | rs3751143 | C__27495274_10 | T | 0.797 | 0.844 |
|               |            |         |           |                | G | 0.203 | 0.156 |

---

\*Custom assay
